# Supplementary material
Source: MDPI journal article supplement (https://www.mdpi.com/2076-3417/12/6/3030)
Supplement: s1 [file s1 › applsci-1611819-SI.csv]

ID	Outcome	Stage	CHCA	CHCA DTT	SA	SA DTT	SA high
1818	Case	4
2015	Case	4
2160	Case	4					1
2226	Case	4			1		1
2281	Case	4				1	1
2633	Case	1/2				1	1
2716	Case	4			1	1	1
2769	Case	1/2
2804	Case	4					1
2960	Case	1/2
4383	Case	4
4618	Case	1/2			1	1	1
4621	Case	1/2
4628	Case	1/2
4674	Case	1/2					1
4739	Case	1/2
5647	Control	NA			1		1
5648	Control	NA			1	1	1
5649	Control	NA					1
5650	Control	NA				1	1
5651	Control	NA
5653	Control	NA				1	1
5656	Control	NA			1
5657	Control	NA
5658	Control	NA			1	1	1
5663	Control	NA
5664	Control	NA			1
5665	Control	NA
5666	Control	NA					1
5681	Control	NA
5682	Control	NA					1
5683	Control	NA		1			1
5684	Control	NA
5685	Control	NA					1
5686	Control	NA					1
5687	Control	NA					1
5688	Control	NA
5689	Control	NA					1
5690	Control	NA			1
5691	Control	NA				1	1
5692	Control	NA		1			1
5693	Control	NA			1		1
5734	Control	NA					1
5735	Control	NA
5736	Control	NA					1
5737	Control	NA					1
5738	Control	NA				1	1
5740	Control	NA					1
5746	Control	NA				1	1
5747	Control	NA		1	1		1
5748	Control	NA					1
5771	Control	NA
5772	Control	NA
5773	Control	NA
6202	Case	1/2			1	1	1
6204	Case	1/2
7343	Case	4			1		1
7360	Case	4
7518	Case	1/2				1	1
7524	Case	1/2		1			1
7559	Case	1/2
7565	Case	1/2		1			1
7566	Case	1/2				1	1
7583	Case	1/2				1	1
7584	Case	1/2					1
7615	Case	1/2		1			1
7616	Case	1/2				1	1
7618	Case	1/2					1
7620	Case	1/2				1	1
7622	Case	1/2
7626	Case	1/2					1
7653	Case	1/2
7654	Case	1/2					1
7657	Case	1/2				1	1
7675	Case	1/2					1
7705	Case	1/2				1	1
7718	Case	1/2
7994	Case	4
8191	Case	1/2
8192	Case	1/2				1	1
8193	Case	1/2			1		1
8196	Case	1/2
8200	Case	1/2					1
8258	Case	1/2
8259	Case	1/2
8308	Case	4
8338	Case	4					1
8339	Case	4					1
8366	Case	4			1	1
8372	Case	4					1
8394	Case	4
8467	Case	4
8523	Case	4					1
8567	Case	4				1	1
8623	Case	4			1
8660	Case	4
8740	Case	4
8760	Case	4				1
8764	Case	4			1	1	1
8783	Case	4				1	1
8784	Case	4					1
8795	Case	4			1		1
8805	Case	4					1
8889	Case	4			1	1	1
8938	Case	4			1	1	1
8948	Case	4			1	1	1
8951	Case	4			1	1	1
8973	Case	4
8981	Case	4
8990	Case	4
9026	Case	4					1
9055	Case	4			1	1	1
9079	Case	4
9081	Case	4			1	1	1
9378	Case	4
9387	Case	4				1	1
9427	Case	4				1	1
106TD	Case	3				1	1
115TD	Case	3					1
11TD	Case	4
12TD	Case	4				1	1
13TD	Case	4					1
143TD	Case	3					1
146TD	Case	3
172TD	Case	3
174TD	Case	3				1	1
175TD	Case	3				1	1
179PC	Case	4
17TD	Case	4			1		1
18TD	Case	4			1		1
19TD	Case	4					1
208PC	Case	1/2
211TD	Case	3					1
21TD	Case	4					1
226TD	Case	3
22TD	Case	4
254TD	Case	3				1	1
255TD	Case	3
256TD	Case	3		1		1	1
25TD	Case	4		1		1	1
26TD	Case	4			1	1	1
28TD	Case	4				1	1
290TD	Case	3
33TD	Case	4
353TD	Case	3
366TD	Case	3					1
398TD	Case	3					1
399TD	Case	3				1	1
39TD	Case	4				1	1
3TD	Case	4
418TD	Case	3
419TD	Case	3
432TD	Case	3					1
433TD	Case	3			1	1	1
466TD	Case	3				1	1
49TD	Case	4
4TD	Case	4
521TD	Case	3				1	1
524TD	Case	3
539TD	Case	3
556TD	Case	3		1		1	1
568TD	Case	3
56TD	Case	4
57TD	Case	4			1	1	1
585TD	Case	3				1	1
604TD	Case	3
624TD	Case	3				1	1
62TD	Case	4					1
638TD	Case	3
64TD	Case	3				1
67TD	Case	3
691TD	Case	3					1
6TD	Case	4					1
737TD	Case	3			1	1	1
75PC	Case	4				1	1
774TD	Case	3			1	1
83TD	Case	3		1		1	1
90TD	Case	3
93TD	Case	3
9TD	Case	4					1
PC2007	Case	4
