# Supplementary material
Source: MDPI journal article supplement (https://www.mdpi.com/2076-3417/12/6/3030)
Supplement: s1 [file s1 › Table S1.pdf]

| Filename                                                    | Sample ID | MS quality | Stage1/2 | Stage 3  | Stage 4  | Diagnostic | Cancer Prediction |
|-------------------------------------------------------------|-----------|------------|----------|----------|----------|------------|-------------------|
| ID208PC-r1-1in80-CHCA-S-OvarianCancer-8020H-Bed-141019.mzml | 208PC     | VERY GOOD  | Positive | Negative | Positive | Case 1_2   | Positive          |
| ID2633-r1-1in80-CHCA-S-OvarianCancer-8020H-Bed-130919.mzml  | 2633      | GOOD       | Positive | Negative | Positive | Case 1_2   | Positive          |
| ID2769-r1-1in80-CHCA-S-OvarianCancer-8020H-Bed-110919.mzml  | 2769      | GOOD       | Negative | Negative | Negative | Case 1_2   | Negative          |
| ID2960-r1-1in80-CHCA-S-OvarianCancer-8020H-Bed-110919.mzml  | 2960      | GOOD       | Negative | Negative | Negative | Case 1_2   | Negative          |
| ID4618-r1-1in80-CHCA-S-OvarianCancer-8020H-Bed-200919.mzml  | 4618      | VERY GOOD  | Positive | Negative | Positive | Case 1_2   | Positive          |
| ID4621-r1-1in80-CHCA-S-OvarianCancer-8020H-Bed-110919.mzml  | 4621      | BAD        | Positive | Positive | Positive | Case 1_2   | Positive          |
| ID4628-r1-1in80-CHCA-S-OvarianCancer-8020H-Bed-081019.mzml  | 4628      | VERY GOOD  | Positive | Negative | Negative | Case 1_2   | Positive          |
| ID4674-r1-1in80-CHCA-S-OvarianCancer-8020H-Bed-170919.mzml  | 4674      | BAD        | Positive | Negative | Positive | Case 1_2   | Positive          |
| ID4739-r1-1in80-CHCA-S-OvarianCancer-8020H-Bed-090919.mzml  | 4739      | VERY GOOD  | Positive | Negative | Positive | Case 1_2   | Positive          |
| ID6202-r1-1in80-CHCA-S-OvarianCancer-8020H-Bed-200919.mzml  | 6202      | VERY GOOD  | Negative | Positive | Positive | Case 1_2   | Positive          |
| ID6204-r1-1in80-CHCA-S-OvarianCancer-8020H-Bed-110919.mzml  | 6204      | VERY GOOD  | Positive | Positive | Negative | Case 1_2   | Positive          |
| ID7518-r1-1in80-CHCA-S-OvarianCancer-8020H-Bed-130919.mzml  | 7518      | GOOD       | Positive | Positive | Positive | Case 1_2   | Positive          |
| ID7524-r1-1in80-CHCA-S-OvarianCancer-8020H-Bed-190919.mzml  | 7524      | VERY GOOD  | Positive | Positive | Positive | Case 1_2   | Positive          |
| ID7559-r1-1in80-CHCA-S-OvarianCancer-8020H-Bed-090919.mzml  | 7559      | VERY GOOD  | Positive | Positive | Positive | Case 1_2   | Positive          |
| ID7559-r2-1in80-CHCA-S-OvarianCancer-8020H-Bed-141019.mzml  | 7559      | VERY GOOD  | Positive | Negative | Positive | Case 1_2   | Positive          |
| ID7565-r1-1in80-CHCA-S-OvarianCancer-8020H-Bed-190919.mzml  | 7565      | GOOD       | Positive | Positive | Negative | Case 1_2   | Positive          |
| ID7566-r1-1in80-CHCA-S-OvarianCancer-8020H-Bed-190919.mzml  | 7566      | GOOD       | Positive | Positive | Positive | Case 1_2   | Positive          |
| ID7583-r1-1in80-CHCA-S-OvarianCancer-8020H-Bed-130919.mzml  | 7583      | GOOD       | Positive | Negative | Negative | Case 1_2   | Positive          |
| ID7584-r1-1in80-CHCA-S-OvarianCancer-8020H-Bed-181019.mzml  | 7584      | VERY GOOD  | Negative | Positive | Positive | Case 1_2   | Positive          |
| ID7615-r1-1in80-CHCA-S-OvarianCancer-8020H-Bed-190919.mzml  | 7615      | GOOD       | Positive | Positive | Negative | Case 1_2   | Positive          |
| ID7616-r1-1in80-CHCA-S-OvarianCancer-8020H-Bed-130919.mzml  | 7616      | GOOD       | Positive | Positive | Positive | Case 1_2   | Positive          |
| ID7618-r1-1in80-CHCA-S-OvarianCancer-8020H-Bed-200919.mzml  | 7618      | VERY GOOD  | Positive | Positive | Positive | Case 1_2   | Positive          |
| ID7620-r1-1in80-CHCA-S-OvarianCancer-8020H-Bed-190919.mzml  | 7620      | GOOD       | Positive | Positive | Negative | Case 1_2   | Positive          |
| ID7622-r1-1in80-CHCA-S-OvarianCancer-8020H-Bed-151019.mzml  | 7622      | VERY GOOD  | Positive | Positive | Positive | Case 1_2   | Positive          |
| ID7626-r1-1in80-CHCA-S-OvarianCancer-8020H-Bed-170919.mzml  | 7626      | GOOD       | Positive | Negative | Positive | Case 1_2   | Positive          |
| ID7654-r1-1in80-CHCA-S-OvarianCancer-8020H-Bed-170919.mzml  | 7654      | GOOD       | Positive | Positive | Positive | Case 1_2   | Positive          |
| ID7657-r1-1in80-CHCA-S-OvarianCancer-8020H-Bed-170919.mzml  | 7657      | GOOD       | Positive | Positive | Positive | Case 1_2   | Positive          |

|                                                             |       |           |          |          |          |          |          |
|-------------------------------------------------------------|-------|-----------|----------|----------|----------|----------|----------|
| ID7675-r1-1in80-CHCA-S-OvarianCancer-8020H-Bed-110919.mzml  | 7675  | VERY GOOD | Positive | Negative | Negative | Case 1_2 | Positive |
| ID7705-r1-1in80-CHCA-S-OvarianCancer-8020H-Bed-130919.mzml  | 7705  | GOOD      | Positive | Negative | Positive | Case 1_2 | Positive |
| ID7718-r1-1in80-CHCA-S-OvarianCancer-8020H-Bed-081019.mzml  | 7718  | GOOD      | Positive | Positive | Positive | Case 1_2 | Positive |
| ID8191-r1-1in80-CHCA-S-OvarianCancer-8020H-Bed-090919.mzml  | 8191  | VERY GOOD | Positive | Negative | Negative | Case 1_2 | Positive |
| ID8192-r1-1in80-CHCA-S-OvarianCancer-8020H-Bed-170919.mzml  | 8192  | GOOD      | Positive | Positive | Positive | Case 1_2 | Positive |
| ID8193-r1-1in80-CHCA-S-OvarianCancer-8020H-Bed-181019.mzml  | 8193  | VERY GOOD | Positive | Positive | Positive | Case 1_2 | Positive |
| ID8196-r1-1in80-CHCA-S-OvarianCancer-8020H-Bed-141019.mzml  | 8196  | VERY GOOD | Negative | Positive | Positive | Case 1_2 | Positive |
| ID8200-r1-1in80-CHCA-S-OvarianCancer-8020H-Bed-200919.mzml  | 8200  | VERY GOOD | Positive | Positive | Positive | Case 1_2 | Positive |
| ID8258-r1-1in80-CHCA-S-OvarianCancer-8020H-Bed-090919.mzml  | 8258  | VERY GOOD | Negative | Negative | Negative | Case 1_2 | Negative |
| ID8259-r1-1in80-CHCA-S-OvarianCancer-8020H-Bed-090919.mzml  | 8259  | VERY GOOD | Positive | Positive | Positive | Case 1_2 | Positive |
| ID106TD-r1-1in80-CHCA-S-OvarianCancer-8020H-Bed-190919.mzml | 106TD | GOOD      | Positive | Positive | Positive | Case3    | Positive |
| ID115TD-r1-1in80-CHCA-S-OvarianCancer-8020H-Bed-190919.mzml | 115TD | GOOD      | Positive | Positive | Positive | Case3    | Positive |
| ID143TD-r1-1in80-CHCA-S-OvarianCancer-8020H-Bed-200919.mzml | 143TD | VERY GOOD | Positive | Positive | Negative | Case3    | Positive |
| ID146TD-r1-1in80-CHCA-S-OvarianCancer-8020H-Bed-141019.mzml | 146TD | GOOD      | Negative | Positive | Positive | Case3    | Positive |
| ID172TD-r1-1in80-CHCA-S-OvarianCancer-8020H-Bed-090919.mzml | 172TD | VERY GOOD | Positive | Positive | Positive | Case3    | Positive |
| ID174TD-r1-1in80-CHCA-S-OvarianCancer-8020H-Bed-170919.mzml | 174TD | VERY GOOD | Positive | Positive | Positive | Case3    | Positive |
| ID175TD-r1-1in80-CHCA-S-OvarianCancer-8020H-Bed-130919.mzml | 175TD | BAD       | Positive | Positive | Positive | Case3    | Positive |
| ID211TD-r1-1in80-CHCA-S-OvarianCancer-8020H-Bed-110919.mzml | 211TD | GOOD      | Negative | Positive | Positive | Case3    | Positive |
| ID226TD-r1-1in80-CHCA-S-OvarianCancer-8020H-Bed-090919.mzml | 226TD | VERY GOOD | Negative | Negative | Positive | Case3    | Positive |
| ID254TD-r1-1in80-CHCA-S-OvarianCancer-8020H-Bed-200919.mzml | 254TD | VERY GOOD | Positive | Positive | Positive | Case3    | Positive |
| ID255TD-r1-1in80-CHCA-S-OvarianCancer-8020H-Bed-141019.mzml | 255TD | VERY GOOD | Negative | Positive | Positive | Case3    | Positive |
| ID256TD-r1-1in80-CHCA-S-OvarianCancer-8020H-Bed-170919.mzml | 256TD | GOOD      | Positive | Negative | Negative | Case3    | Positive |
| ID290TD-r1-1in80-CHCA-S-OvarianCancer-8020H-Bed-181019.mzml | 290TD | VERY GOOD | Positive | Positive | Positive | Case3    | Positive |
| ID353TD-r1-1in80-CHCA-S-OvarianCancer-8020H-Bed-090919.mzml | 353TD | VERY GOOD | Negative | Positive | Positive | Case3    | Positive |
| ID366TD-r1-1in80-CHCA-S-OvarianCancer-8020H-Bed-200919.mzml | 366TD | VERY GOOD | Positive | Positive | Positive | Case3    | Positive |
| ID398TD-r1-1in80-CHCA-S-OvarianCancer-8020H-Bed-110919.mzml | 398TD | GOOD      | Positive | Negative | Negative | Case3    | Positive |
| ID399TD-r1-1in80-CHCA-S-OvarianCancer-8020H-Bed-130919.mzml | 399TD | VERY GOOD | Positive | Positive | Positive | Case3    | Positive |
| ID418TD-r1-1in80-CHCA-S-OvarianCancer-8020H-Bed-181019.mzml | 418TD | GOOD      | Positive | Positive | Positive | Case3    | Positive |

|                                                             |       |           |          |          |          |       |          |
|-------------------------------------------------------------|-------|-----------|----------|----------|----------|-------|----------|
| ID419TD-r1-1in80-CHCA-S-OvarianCancer-8020H-Bed-090919.mzml | 419TD | VERY GOOD | Positive | Positive | Positive | Case3 | Positive |
| ID432TD-r1-1in80-CHCA-S-OvarianCancer-8020H-Bed-190919.mzml | 432TD | GOOD      | Positive | Positive | Positive | Case3 | Positive |
| ID433TD-r1-1in80-CHCA-S-OvarianCancer-8020H-Bed-200919.mzml | 433TD | VERY GOOD | Negative | Positive | Positive | Case3 | Positive |
| ID466TD-r1-1in80-CHCA-S-OvarianCancer-8020H-Bed-200919.mzml | 466TD | VERY GOOD | Negative | Positive | Negative | Case3 | Positive |
| ID521TD-r1-1in80-CHCA-S-OvarianCancer-8020H-Bed-130919.mzml | 521TD | VERY GOOD | Positive | Positive | Negative | Case3 | Positive |
| ID524TD-r1-1in80-CHCA-S-OvarianCancer-8020H-Bed-110919.mzml | 524TD | VERY GOOD | Negative | Negative | Negative | Case3 | Negative |
| ID539TD-r1-1in80-CHCA-S-OvarianCancer-8020H-Bed-081019.mzml | 539TD | GOOD      | Negative | Negative | Positive | Case3 | Positive |
| ID556TD-r1-1in80-CHCA-S-OvarianCancer-8020H-Bed-170919.mzml | 556TD | GOOD      | Positive | Positive | Positive | Case3 | Positive |
| ID568TD-r1-1in80-CHCA-S-OvarianCancer-8020H-Bed-081019.mzml | 568TD | GOOD      | Negative | Positive | Positive | Case3 | Positive |
| ID585TD-r1-1in80-CHCA-S-OvarianCancer-8020H-Bed-170919.mzml | 585TD | GOOD      | Positive | Positive | Positive | Case3 | Positive |
| ID604TD-r1-1in80-CHCA-S-OvarianCancer-8020H-Bed-081019.mzml | 604TD | VERY GOOD | Negative | Positive | Positive | Case3 | Positive |
| ID624TD-r1-1in80-CHCA-S-OvarianCancer-8020H-Bed-130919.mzml | 624TD | VERY GOOD | Negative | Positive | Positive | Case3 | Positive |
| ID638TD-r1-1in80-CHCA-S-OvarianCancer-8020H-Bed-110919.mzml | 638TD | GOOD      | Positive | Positive | Positive | Case3 | Positive |
| ID64TD-r1-1in80-CHCA-S-OvarianCancer-8020H-Bed-130919.mzml  | 64TD  | GOOD      | Positive | Positive | Positive | Case3 | Positive |
| ID67TD-r1-1in80-CHCA-S-OvarianCancer-8020H-Bed-081019.mzml  | 67TD  | GOOD      | Negative | Negative | Negative | Case3 | Negative |
| ID691TD-r1-1in80-CHCA-S-OvarianCancer-8020H-Bed-190919.mzml | 691TD | GOOD      | Positive | Positive | Positive | Case3 | Positive |
| ID737TD-r1-1in80-CHCA-S-OvarianCancer-8020H-Bed-190919.mzml | 737TD | VERY GOOD | Positive | Positive | Positive | Case3 | Positive |
| ID774TD-r1-1in80-CHCA-S-OvarianCancer-8020H-Bed-151019.mzml | 774TD | VERY GOOD | Positive | Positive | Positive | Case3 | Positive |
| ID83TD-r1-1in80-CHCA-S-OvarianCancer-8020H-Bed-170919.mzml  | 83TD  | BAD       | Positive | Positive | Negative | Case3 | Positive |
| ID90TD-r1-1in80-CHCA-S-OvarianCancer-8020H-Bed-090919.mzml  | 90TD  | VERY GOOD | Negative | Positive | Positive | Case3 | Positive |
| ID93TD-r1-1in80-CHCA-S-OvarianCancer-8020H-Bed-110919.mzml  | 93TD  | VERY GOOD | Negative | Negative | Negative | Case3 | Negative |
| ID11TD-r1-1in80-CHCA-S-OvarianCancer-8020H-Bed-141019.mzml  | 11TD  | VERY GOOD | Positive | Positive | Positive | Case4 | Positive |
| ID12TD-r1-1in80-CHCA-S-OvarianCancer-8020H-Bed-170919.mzml  | 12TD  | GOOD      | Negative | Negative | Positive | Case4 | Positive |
| ID13TD-r1-1in80-CHCA-S-OvarianCancer-8020H-Bed-141019.mzml  | 13TD  | VERY GOOD | Positive | Positive | Positive | Case4 | Positive |
| ID179PC-r1-1in80-CHCA-S-OvarianCancer-8020H-Bed-090919.mzml | 179PC | VERY GOOD | Negative | Positive | Positive | Case4 | Positive |
| ID17TD-r1-1in80-CHCA-S-OvarianCancer-8020H-Bed-181019.mzml  | 17TD  | VERY GOOD | Positive | Positive | Positive | Case4 | Positive |
| ID1818-r1-1in80-CHCA-S-OvarianCancer-8020H-Bed-090919.mzml  | 1818  | VERY GOOD | Negative | Positive | Positive | Case4 | Positive |
| ID18TD-r1-1in80-CHCA-S-OvarianCancer-8020H-Bed-190919.mzml  | 18TD  | GOOD      | Positive | Positive | Negative | Case4 | Positive |

|                                                            |      |           |          |          |          |       |          |
|------------------------------------------------------------|------|-----------|----------|----------|----------|-------|----------|
| ID19TD-r1-1in80-CHCA-S-OvarianCancer-8020H-Bed-181019.mzml | 19TD | VERY GOOD | Negative | Positive | Positive | Case4 | Positive |
| ID2015-r1-1in80-CHCA-S-OvarianCancer-8020H-Bed-081019.mzml | 2015 | VERY GOOD | Positive | Positive | Positive | Case4 | Positive |
| ID2160-r1-1in80-CHCA-S-OvarianCancer-8020H-Bed-181019.mzml | 2160 | VERY GOOD | Positive | Positive | Positive | Case4 | Positive |
| ID21TD-r1-1in80-CHCA-S-OvarianCancer-8020H-Bed-181019.mzml | 21TD | VERY GOOD | Positive | Positive | Positive | Case4 | Positive |
| ID2226-r1-1in80-CHCA-S-OvarianCancer-8020H-Bed-181019.mzml | 2226 | VERY GOOD | Positive | Positive | Positive | Case4 | Positive |
| ID2281-r1-1in80-CHCA-S-OvarianCancer-8020H-Bed-181019.mzml | 2281 | VERY GOOD | Positive | Positive | Positive | Case4 | Positive |
| ID22TD-r1-1in80-CHCA-S-OvarianCancer-8020H-Bed-081019.mzml | 22TD | VERY GOOD | Negative | Negative | Positive | Case4 | Positive |
| ID25TD-r1-1in80-CHCA-S-OvarianCancer-8020H-Bed-170919.mzml | 25TD | VERY GOOD | Positive | Positive | Positive | Case4 | Positive |
| ID26TD-r1-1in80-CHCA-S-OvarianCancer-8020H-Bed-170919.mzml | 26TD | VERY GOOD | Positive | Positive | Positive | Case4 | Positive |
| ID2716-r1-1in80-CHCA-S-OvarianCancer-8020H-Bed-181019.mzml | 2716 | VERY GOOD | Negative | Positive | Positive | Case4 | Positive |
| ID2804-r1-1in80-CHCA-S-OvarianCancer-8020H-Bed-200919.mzml | 2804 | VERY GOOD | Negative | Negative | Positive | Case4 | Positive |
| ID28TD-r1-1in80-CHCA-S-OvarianCancer-8020H-Bed-200919.mzml | 28TD | VERY GOOD | Positive | Positive | Positive | Case4 | Positive |
| ID33TD-r1-1in80-CHCA-S-OvarianCancer-8020H-Bed-110919.mzml | 33TD | VERY GOOD | Negative | Positive | Negative | Case4 | Positive |
| ID39TD-r1-1in80-CHCA-S-OvarianCancer-8020H-Bed-190919.mzml | 39TD | VERY GOOD | Positive | Positive | Positive | Case4 | Positive |
| ID3TD-r1-1in80-CHCA-S-OvarianCancer-8020H-Bed-141019.mzml  | 3TD  | VERY GOOD | Positive | Positive | Positive | Case4 | Positive |
| ID4383-r1-1in80-CHCA-S-OvarianCancer-8020H-Bed-110919.mzml | 4383 | VERY GOOD | Negative | Negative | Negative | Case4 | Negative |
| ID49TD-r1-1in80-CHCA-S-OvarianCancer-8020H-Bed-141019.mzml | 49TD | VERY GOOD | Negative | Positive | Positive | Case4 | Positive |
| ID4TD-r1-1in80-CHCA-S-OvarianCancer-8020H-Bed-141019.mzml  | 4TD  | VERY GOOD | Positive | Positive | Positive | Case4 | Positive |
| ID56TD-r1-1in80-CHCA-S-OvarianCancer-8020H-Bed-110919.mzml | 56TD | VERY GOOD | Negative | Negative | Negative | Case4 | Positive |
| ID57TD-r1-1in80-CHCA-S-OvarianCancer-8020H-Bed-130919.mzml | 57TD | VERY GOOD | Negative | Positive | Positive | Case4 | Positive |
| ID62TD-r1-1in80-CHCA-S-OvarianCancer-8020H-Bed-081019.mzml | 62TD | VERY GOOD | Negative | Negative | Positive | Case4 | Positive |
| ID6TD-r1-1in80-CHCA-S-OvarianCancer-8020H-Bed-170919.mzml  | 6TD  | VERY GOOD | Positive | Positive | Positive | Case4 | Positive |
| ID7343-r1-1in80-CHCA-S-OvarianCancer-8020H-Bed-181019.mzml | 7343 | VERY GOOD | Positive | Positive | Positive | Case4 | Positive |
| ID7360-r1-1in80-CHCA-S-OvarianCancer-8020H-Bed-141019.mzml | 7360 | VERY GOOD | Negative | Negative | Positive | Case4 | Positive |
| ID75PC-r1-1in80-CHCA-S-OvarianCancer-8020H-Bed-200919.mzml | 75PC | VERY GOOD | Positive | Positive | Positive | Case4 | Positive |
| ID7994-r1-1in80-CHCA-S-OvarianCancer-8020H-Bed-081019.mzml | 7994 | VERY GOOD | Negative | Negative | Positive | Case4 | Positive |
| ID8308-r1-1in80-CHCA-S-OvarianCancer-8020H-Bed-141019.mzml | 8308 | VERY GOOD | Negative | Negative | Positive | Case4 | Positive |
| ID8338-r1-1in80-CHCA-S-OvarianCancer-8020H-Bed-141019.mzml | 8338 | VERY GOOD | Negative | Negative | Positive | Case4 | Positive |

|                                                            |      |           |          |          |          |       |          |
|------------------------------------------------------------|------|-----------|----------|----------|----------|-------|----------|
| ID8339-r1-1in80-CHCA-S-OvarianCancer-8020H-Bed-181019.mzml | 8339 | VERY GOOD | Positive | Positive | Positive | Case4 | Positive |
| ID8366-r1-1in80-CHCA-S-OvarianCancer-8020H-Bed-170919.mzml | 8366 | BAD       | Positive | Positive | Positive | Case4 | Positive |
| ID8372-r1-1in80-CHCA-S-OvarianCancer-8020H-Bed-181019.mzml | 8372 | VERY GOOD | Positive | Positive | Positive | Case4 | Positive |
| ID8394-r1-1in80-CHCA-S-OvarianCancer-8020H-Bed-090919.mzml | 8394 | VERY GOOD | Negative | Negative | Positive | Case4 | Positive |
| ID8467-r1-1in80-CHCA-S-OvarianCancer-8020H-Bed-081019.mzml | 8467 | GOOD      | Negative | Positive | Positive | Case4 | Positive |
| ID8523-r1-1in80-CHCA-S-OvarianCancer-8020H-Bed-181019.mzml | 8523 | VERY GOOD | Positive | Positive | Positive | Case4 | Positive |
| ID8567-r1-1in80-CHCA-S-OvarianCancer-8020H-Bed-130919.mzml | 8567 | GOOD      | Negative | Negative | Negative | Case4 | Negative |
| ID8623-r1-1in80-CHCA-S-OvarianCancer-8020H-Bed-151019.mzml | 8623 | VERY GOOD | Negative | Negative | Positive | Case4 | Positive |
| ID8660-r1-1in80-CHCA-S-OvarianCancer-8020H-Bed-081019.mzml | 8660 | GOOD      | Negative | Negative | Positive | Case4 | Positive |
| ID8740-r1-1in80-CHCA-S-OvarianCancer-8020H-Bed-081019.mzml | 8740 | GOOD      | Negative | Negative | Positive | Case4 | Positive |
| ID8760-r1-1in80-CHCA-S-OvarianCancer-8020H-Bed-081019.mzml | 8760 | GOOD      | Positive | Negative | Positive | Case4 | Positive |
| ID8764-r1-1in80-CHCA-S-OvarianCancer-8020H-Bed-190919.mzml | 8764 | VERY GOOD | Positive | Positive | Positive | Case4 | Positive |
| ID8783-r1-1in80-CHCA-S-OvarianCancer-8020H-Bed-190919.mzml | 8783 | VERY GOOD | Positive | Positive | Positive | Case4 | Positive |
| ID8784-r1-1in80-CHCA-S-OvarianCancer-8020H-Bed-151019.mzml | 8784 | VERY GOOD | Negative | Negative | Positive | Case4 | Positive |
| ID8795-r1-1in80-CHCA-S-OvarianCancer-8020H-Bed-181019.mzml | 8795 | VERY GOOD | Negative | Positive | Positive | Case4 | Positive |
| ID8805-r1-1in80-CHCA-S-OvarianCancer-8020H-Bed-141019.mzml | 8805 | GOOD      | Negative | Positive | Positive | Case4 | Positive |
| ID8889-r1-1in80-CHCA-S-OvarianCancer-8020H-Bed-200919.mzml | 8889 | VERY GOOD | Negative | Positive | Positive | Case4 | Positive |
| ID8938-r1-1in80-CHCA-S-OvarianCancer-8020H-Bed-130919.mzml | 8938 | GOOD      | Negative | Positive | Positive | Case4 | Positive |
| ID8948-r1-1in80-CHCA-S-OvarianCancer-8020H-Bed-130919.mzml | 8948 | GOOD      | Positive | Negative | Positive | Case4 | Positive |
| ID8951-r1-1in80-CHCA-S-OvarianCancer-8020H-Bed-151019.mzml | 8951 | VERY GOOD | Positive | Negative | Positive | Case4 | Positive |
| ID8973-r1-1in80-CHCA-S-OvarianCancer-8020H-Bed-110919.mzml | 8973 | GOOD      | Negative | Positive | Positive | Case4 | Positive |
| ID8981-r1-1in80-CHCA-S-OvarianCancer-8020H-Bed-141019.mzml | 8981 | VERY GOOD | Negative | Positive | Positive | Case4 | Positive |
| ID8990-r1-1in80-CHCA-S-OvarianCancer-8020H-Bed-090919.mzml | 8990 | VERY GOOD | Positive | Positive | Positive | Case4 | Positive |
| ID9026-r1-1in80-CHCA-S-OvarianCancer-8020H-Bed-151019.mzml | 9026 | VERY GOOD | Positive | Negative | Positive | Case4 | Positive |
| ID9055-r1-1in80-CHCA-S-OvarianCancer-8020H-Bed-200919.mzml | 9055 | VERY GOOD | Positive | Positive | Negative | Case4 | Positive |
| ID9079-r1-1in80-CHCA-S-OvarianCancer-8020H-Bed-090919.mzml | 9079 | VERY GOOD | Positive | Positive | Positive | Case4 | Positive |
| ID9081-r1-1in80-CHCA-S-OvarianCancer-8020H-Bed-190919.mzml | 9081 | GOOD      | Positive | Positive | Negative | Case4 | Positive |
| ID9378-r1-1in80-CHCA-S-OvarianCancer-8020H-Bed-110919.mzml | 9378 | GOOD      | Positive | Positive | Negative | Case4 | Positive |

|                                                              |        |           |          |          |          |         |          |
|--------------------------------------------------------------|--------|-----------|----------|----------|----------|---------|----------|
| ID9387-r1-1in80-CHCA-S-OvarianCancer-8020H-Bed-130919.mzml   | 9387   | VERY GOOD | Positive | Negative | Positive | Case4   | Positive |
| ID9427-r1-1in80-CHCA-S-OvarianCancer-8020H-Bed-181019.mzml   | 9427   | VERY GOOD | Positive | Positive | Positive | Case4   | Positive |
| ID9TD-r1-1in80-CHCA-S-OvarianCancer-8020H-Bed-181019.mzml    | 9TD    | VERY GOOD | Positive | Positive | Positive | Case4   | Positive |
| IDPC2007-r1-1in80-CHCA-S-OvarianCancer-8020H-Bed-141019.mzml | PC2007 | VERY GOOD | Positive | Positive | Positive | Case4   | Positive |
| ID5647-r1-1in80-CHCA-S-OvarianCancer-8020H-Bed-200919.mzml   | 5647   | VERY GOOD | Negative | Negative | Negative | Control | Negative |
| ID5648-r1-1in80-CHCA-S-OvarianCancer-8020H-Bed-170919.mzml   | 5648   | GOOD      | Negative | Negative | Positive | Control | Positive |
| ID5649-r1-1in80-CHCA-S-OvarianCancer-8020H-Bed-141019.mzml   | 5649   | VERY GOOD | Negative | Negative | Negative | Control | Negative |
| ID5650-r1-1in80-CHCA-S-OvarianCancer-8020H-Bed-130919.mzml   | 5650   | GOOD      | Negative | Negative | Negative | Control | Negative |
| ID5651-r1-1in80-CHCA-S-OvarianCancer-8020H-Bed-110919.mzml   | 5651   | GOOD      | Negative | Negative | Negative | Control | Negative |
| ID5653-r1-1in80-CHCA-S-OvarianCancer-8020H-Bed-190919.mzml   | 5653   | GOOD      | Positive | Negative | Negative | Control | Positive |
| ID5656-r1-1in80-CHCA-S-OvarianCancer-8020H-Bed-081019.mzml   | 5656   | GOOD      | Negative | Negative | Negative | Control | Negative |
| ID5657-r1-1in80-CHCA-S-OvarianCancer-8020H-Bed-110919.mzml   | 5657   | GOOD      | Negative | Negative | Negative | Control | Negative |
| ID5658-r1-1in80-CHCA-S-OvarianCancer-8020H-Bed-190919.mzml   | 5658   | GOOD      | Negative | Negative | Negative | Control | Negative |
| ID5663-r1-1in80-CHCA-S-OvarianCancer-8020H-Bed-090919.mzml   | 5663   | VERY GOOD | Negative | Negative | Negative | Control | Negative |
| ID5664-r1-1in80-CHCA-S-OvarianCancer-8020H-Bed-151019.mzml   | 5664   | VERY GOOD | Negative | Negative | Negative | Control | Negative |
| ID5665-r1-1in80-CHCA-S-OvarianCancer-8020H-Bed-081019.mzml   | 5665   | VERY GOOD | Negative | Negative | Positive | Control | Positive |
| ID5666-r1-1in80-CHCA-S-OvarianCancer-8020H-Bed-190919.mzml   | 5666   | GOOD      | Positive | Negative | Negative | Control | Positive |
| ID5681-r2-1in80-CHCA-S-OvarianCancer-8020H-Bed-141019.mzml   | 5681   | VERY GOOD | Negative | Negative | Negative | Control | Negative |
| ID5682-r1-1in80-CHCA-S-OvarianCancer-8020H-Bed-200919.mzml   | 5682   | VERY GOOD | Positive | Positive | Positive | Control | Positive |
| ID5683-r1-1in80-CHCA-S-OvarianCancer-8020H-Bed-190919.mzml   | 5683   | GOOD      | Negative | Negative | Negative | Control | Negative |
| ID5684-r1-1in80-CHCA-S-OvarianCancer-8020H-Bed-090919.mzml   | 5684   | VERY GOOD | Positive | Negative | Negative | Control | Positive |
| ID5685-r1-1in80-CHCA-S-OvarianCancer-8020H-Bed-130919.mzml   | 5685   | BAD       | Negative | Negative | Negative | Control | Negative |
| ID5686-r1-1in80-CHCA-S-OvarianCancer-8020H-Bed-181019.mzml   | 5686   | VERY GOOD | Negative | Positive | Positive | Control | Positive |
| ID5687-r1-1in80-CHCA-S-OvarianCancer-8020H-Bed-200919.mzml   | 5687   | VERY GOOD | Negative | Negative | Negative | Control | Negative |
| ID5688-r1-1in80-CHCA-S-OvarianCancer-8020H-Bed-090919.mzml   | 5688   | VERY GOOD | Positive | Negative | Negative | Control | Positive |
| ID5689-r1-1in80-CHCA-S-OvarianCancer-8020H-Bed-200919.mzml   | 5689   | VERY GOOD | Negative | Negative | Negative | Control | Negative |
| ID5690-r1-1in80-CHCA-S-OvarianCancer-8020H-Bed-110919.mzml   | 5690   | VERY GOOD | Negative | Negative | Negative | Control | Negative |
| ID5691-r1-1in80-CHCA-S-OvarianCancer-8020H-Bed-130919.mzml   | 5691   | GOOD      | Negative | Negative | Negative | Control | Negative |

|                                                            |      |      |          |          |          |         |          |
|------------------------------------------------------------|------|------|----------|----------|----------|---------|----------|
| ID5692-r1-1in80-CHCA-S-OvarianCancer-8020H-Bed-170919.mzml | 5692 | GOOD | Negative | Negative | Negative | Control | Negative |
| ID5693-r1-1in80-CHCA-S-OvarianCancer-8020H-Bed-170919.mzml | 5693 | BAD  | Negative | Positive | Negative | Control | Positive |
| ID5734-r1-1in80-CHCA-S-OvarianCancer-8020H-Bed-200919.mzml | 5734 | VERY | Negative | Negative | Negative | Control | Negative |
| ID5735-r1-1in80-CHCA-S-OvarianCancer-8020H-Bed-090919.mzml | 5735 | GOOD | Negative | Negative | Negative | Control | Negative |
| ID5736-r1-1in80-CHCA-S-OvarianCancer-8020H-Bed-170919.mzml | 5736 | GOOD | Negative | Negative | Negative | Control | Negative |
| ID5737-r1-1in80-CHCA-S-OvarianCancer-8020H-Bed-181019.mzml | 5737 | VERY | Negative | Positive | Positive | Control | Positive |
| ID5738-r1-1in80-CHCA-S-OvarianCancer-8020H-Bed-130919.mzml | 5738 | GOOD | Negative | Negative | Negative | Control | Negative |
| ID5740-r1-1in80-CHCA-S-OvarianCancer-8020H-Bed-110919.mzml | 5740 | GOOD | Negative | Negative | Negative | Control | Negative |
| ID5746-r1-1in80-CHCA-S-OvarianCancer-8020H-Bed-130919.mzml | 5746 | GOOD | Negative | Negative | Negative | Control | Negative |
| ID5747-r1-1in80-CHCA-S-OvarianCancer-8020H-Bed-170919.mzml | 5747 | VERY | Negative | Positive | Negative | Control | Positive |
| ID5748-r1-1in80-CHCA-S-OvarianCancer-8020H-Bed-190919.mzml | 5748 | GOOD | Negative | Negative | Negative | Control | Negative |
| ID5771-r1-1in80-CHCA-S-OvarianCancer-8020H-Bed-141019.mzml | 5771 | GOOD | Negative | Negative | Negative | Control | Negative |
| ID5772-r1-1in80-CHCA-S-OvarianCancer-8020H-Bed-081019.mzml | 5772 | VERY | Negative | Negative | Negative | Control | Negative |
| ID5773-r1-1in80-CHCA-S-OvarianCancer-8020H-Bed-110919.mzml | 5773 | GOOD | Negative | Negative | Negative | Control | Negative |

#### CONFIRMATORY PERFORMANCE OF THE PIPELINE AND DETECTION ALGORITHM

| MODELS                            | Sensitivity | 1-specificity | specificity |
|-----------------------------------|-------------|---------------|-------------|
| Ovarian cancer Early Stages (1+2) | 84%         | 14%           | 86%         |
| Ovarian cancer Stage 3            | 7%          | 13%           | 87%         |
| Ovarian cancer Stage 4            | 88%         | 7%            | 93%         |
| Algorithm combination             | 94%         | 29%           | 71%         |

#### DATA PROCESSING PERFORMANCE OF THE PIPELINE

|                          | Value | Units    |
|--------------------------|-------|----------|
| Number samples processed | 181   | MS files |
| Total running time       | 257   | seconds  |
| Average time / sample    | 1.4   | seconds  |

#### LEGEND

Green accurate prediction
