# Supplementary material
Source: MDPI journal article supplement (https://www.mdpi.com/2076-3417/12/6/3030)
Supplement: s1 [file s1 › Table S2.pdf]

| Filename                                                 | sample ID | MS quality | Stage1/2 | Stage 3  | Stage 4  | Diagnostic | Cancer Prediction |
|----------------------------------------------------------|-----------|------------|----------|----------|----------|------------|-------------------|
| ID2633-r1-1in80-SA-S-OvarianCancer-8020H-Bed-130919.mzml | 2633      | VERY GOOD  | Negative | Positive | Negative | Case 1_2   | Positive          |
| ID2769-r1-1in80-SA-S-OvarianCancer-8020H-Bed-110919.mzml | 2769      | VERY GOOD  | Positive | Positive | Positive | Case 1_2   | Positive          |
| ID2960-r1-1in80-SA-S-OvarianCancer-8020H-Bed-110919.mzml | 2960      | VERY GOOD  | Positive | Negative | Negative | Case 1_2   | Positive          |
| ID4618-r1-1in80-SA-S-OvarianCancer-8020H-Bed-200919.mzml | 4618      | GOOD       | Positive | Negative | Positive | Case 1_2   | Positive          |
| ID4621-r1-1in80-SA-S-OvarianCancer-8020H-Bed-110919.mzml | 4621      | VERY GOOD  | Positive | Negative | Positive | Case 1_2   | Positive          |
| ID4628-r1-1in80-SA-S-OvarianCancer-8020H-Bed-111019.mzml | 4628      | VERY GOOD  | Positive | Positive | Positive | Case 1_2   | Positive          |
| ID4674-r1-1in80-SA-S-OvarianCancer-8020H-Bed-160919.mzml | 4674      | VERY GOOD  | Positive | Positive | Positive | Case 1_2   | Positive          |
| ID4739-r1-1in80-SA-S-OvarianCancer-8020H-Bed-050919.mzml | 4739      | VERY GOOD  | Positive | Positive | Negative | Case 1_2   | Positive          |
| ID6202-r2-1in80-SA-S-OvarianCancer-8020H-Bed-011119.mzml | 6202      | GOOD       | Positive | Positive | Negative | Case 1_2   | Positive          |
| ID6204-r1-1in80-SA-S-OvarianCancer-8020H-Bed-110919.mzml | 6204      | VERY GOOD  | Positive | Negative | Positive | Case 1_2   | Positive          |
| ID7518-r1-1in80-SA-S-OvarianCancer-8020H-Bed-130919.mzml | 7518      | VERY GOOD  | Positive | Negative | Negative | Case 1_2   | Positive          |
| ID7524-r1-1in80-SA-S-OvarianCancer-8020H-Bed-180919.mzml | 7524      | VERY GOOD  | Positive | Negative | Positive | Case 1_2   | Positive          |
| ID7559-r1-1in80-SA-S-OvarianCancer-8020H-Bed-071019.mzml | 7559      | VERY GOOD  | Positive | Positive | Positive | Case 1_2   | Positive          |
| ID7565-r1-1in80-SA-S-OvarianCancer-8020H-Bed-180919.mzml | 7565      | VERY GOOD  | Positive | Negative | Positive | Case 1_2   | Positive          |
| ID7566-r1-1in80-SA-S-OvarianCancer-8020H-Bed-180919.mzml | 7566      | VERY GOOD  | Positive | Negative | Negative | Case 1_2   | Positive          |
| ID7583-r1-1in80-SA-S-OvarianCancer-8020H-Bed-130919.mzml | 7583      | VERY GOOD  | Positive | Negative | Negative | Case 1_2   | Positive          |
| ID7584-r1-1in80-SA-S-OvarianCancer-8020H-Bed-181019.mzml | 7584      | GOOD       | Positive | Negative | Negative | Case 1_2   | Positive          |
| ID7615-r1-1in80-SA-S-OvarianCancer-8020H-Bed-180919.mzml | 7615      | VERY GOOD  | Positive | Negative | Negative | Case 1_2   | Positive          |
| ID7616-r1-1in80-SA-S-OvarianCancer-8020H-Bed-130919.mzml | 7616      | VERY GOOD  | Positive | Positive | Positive | Case 1_2   | Positive          |
| ID7618-r1-1in80-SA-S-OvarianCancer-8020H-Bed-200919.mzml | 7618      | VERY GOOD  | Positive | Positive | Positive | Case 1_2   | Positive          |
| ID7620-r1-1in80-SA-S-OvarianCancer-8020H-Bed-180919.mzml | 7620      | VERY GOOD  | Positive | Negative | Positive | Case 1_2   | Positive          |
| ID7622-r1-1in80-SA-S-OvarianCancer-8020H-Bed-151019.mzml | 7622      | GOOD       | Positive | Positive | Positive | Case 1_2   | Positive          |
| ID7626-r1-1in80-SA-S-OvarianCancer-8020H-Bed-160919.mzml | 7626      | VERY GOOD  | Positive | Negative | Positive | Case 1_2   | Positive          |
| ID7654-r1-1in80-SA-S-OvarianCancer-8020H-Bed-160919.mzml | 7654      | VERY GOOD  | Positive | Positive | Positive | Case 1_2   | Positive          |
| ID7657-r1-1in80-SA-S-OvarianCancer-8020H-Bed-160919.mzml | 7657      | VERY GOOD  | Positive | Negative | Positive | Case 1_2   | Positive          |
| ID7675-r1-1in80-SA-S-OvarianCancer-8020H-Bed-110919.mzml | 7675      | VERY GOOD  | Positive | Positive | Positive | Case 1_2   | Positive          |
| ID7705-r1-1in80-SA-S-OvarianCancer-8020H-Bed-130919.mzml | 7705      | VERY GOOD  | Positive | Positive | Positive | Case 1_2   | Positive          |

|                                                           |       |           |          |          |          |          |          |
|-----------------------------------------------------------|-------|-----------|----------|----------|----------|----------|----------|
| ID7718-r1-1in80-SA-S-OvarianCancer-8020H-Bed-111019.mzml  | 7718  | VERY GOOD | Positive | Positive | Positive | Case 1_2 | Positive |
| ID8191-r1-1in80-SA-S-OvarianCancer-8020H-Bed-050919.mzml  | 8191  | VERY GOOD | Positive | Negative | Negative | Case 1_2 | Positive |
| ID8192-r1-1in80-SA-S-OvarianCancer-8020H-Bed-160919.mzml  | 8192  | VERY GOOD | Positive | Negative | Positive | Case 1_2 | Positive |
| ID8193-r1-1in80-SA-S-OvarianCancer-8020H-Bed-181019.mzml  | 8193  | GOOD      | Positive | Negative | Positive | Case 1_2 | Positive |
| ID8196-r1-1in80-SA-S-OvarianCancer-8020H-Bed-071019.mzml  | 8196  | VERY GOOD | Positive | Positive | Positive | Case 1_2 | Positive |
| ID8200-r1-1in80-SA-S-OvarianCancer-8020H-Bed-200919.mzml  | 8200  | VERY GOOD | Positive | Negative | Positive | Case 1_2 | Positive |
| ID8258-r1-1in80-SA-S-OvarianCancer-8020H-Bed-050919.mzml  | 8258  | VERY GOOD | Positive | Positive | Positive | Case 1_2 | Positive |
| ID8259-r1-1in80-SA-S-OvarianCancer-8020H-Bed-050919.mzml  | 8259  | VERY GOOD | Positive | Negative | Negative | Case 1_2 | Positive |
| ID208PC-r1-1in80-SA-S-OvarianCancer-8020H-Bed-071019.mzml | 208PC | VERY GOOD | Positive | Negative | Positive | Case 1_2 | Positive |
| ID106TD-r1-1in80-SA-S-OvarianCancer-8020H-Bed-180919.mzml | 106TD | VERY GOOD | Positive | Positive | Positive | Case3    | Positive |
| ID115TD-r1-1in80-SA-S-OvarianCancer-8020H-Bed-180919.mzml | 115TD | VERY GOOD | Negative | Positive | Positive | Case3    | Positive |
| ID143TD-r1-1in80-SA-S-OvarianCancer-8020H-Bed-200919.mzml | 143TD | GOOD      | Positive | Positive | Positive | Case3    | Positive |
| ID146TD-r1-1in80-SA-S-OvarianCancer-8020H-Bed-071019.mzml | 146TD | VERY GOOD | Negative | Positive | Positive | Case3    | Positive |
| ID172TD-r1-1in80-SA-S-OvarianCancer-8020H-Bed-050919.mzml | 172TD | VERY GOOD | Negative | Positive | Positive | Case3    | Positive |
| ID174TD-r1-1in80-SA-S-OvarianCancer-8020H-Bed-160919.mzml | 174TD | VERY GOOD | Positive | Positive | Positive | Case3    | Positive |
| ID175TD-r1-1in80-SA-S-OvarianCancer-8020H-Bed-130919.mzml | 175TD | VERY GOOD | Positive | Positive | Negative | Case3    | Positive |
| ID211TD-r1-1in80-SA-S-OvarianCancer-8020H-Bed-110919.mzml | 211TD | VERY GOOD | Positive | Positive | Positive | Case3    | Positive |
| ID226TD-r1-1in80-SA-S-OvarianCancer-8020H-Bed-050919.mzml | 226TD | VERY GOOD | Positive | Positive | Negative | Case3    | Positive |
| ID254TD-r1-1in80-SA-S-OvarianCancer-8020H-Bed-200919.mzml | 254TD | VERY GOOD | Negative | Positive | Positive | Case3    | Positive |
| ID255TD-r1-1in80-SA-S-OvarianCancer-8020H-Bed-071019.mzml | 255TD | VERY GOOD | Positive | Positive | Positive | Case3    | Positive |
| ID256TD-r1-1in80-SA-S-OvarianCancer-8020H-Bed-160919.mzml | 256TD | VERY GOOD | Positive | Negative | Negative | Case3    | Positive |
| ID290TD-r1-1in80-SA-S-OvarianCancer-8020H-Bed-181019.mzml | 290TD | VERY GOOD | Positive | Positive | Positive | Case3    | Positive |

|                                                           |       |           |          |          |          |       |          |
|-----------------------------------------------------------|-------|-----------|----------|----------|----------|-------|----------|
| ID353TD-r1-1in80-SA-S-OvarianCancer-8020H-Bed-050919.mzml | 353TD | VERY GOOD | Negative | Positive | Negative | Case3 | Positive |
| ID366TD-r1-1in80-SA-S-OvarianCancer-8020H-Bed-200919.mzml | 366TD | VERY GOOD | Positive | Positive | Positive | Case3 | Positive |
| ID398TD-r1-1in80-SA-S-OvarianCancer-8020H-Bed-110919.mzml | 398TD | VERY GOOD | Positive | Positive | Positive | Case3 | Positive |
| ID399TD-r1-1in80-SA-S-OvarianCancer-8020H-Bed-130919.mzml | 399TD | VERY GOOD | Positive | Positive | Positive | Case3 | Positive |
| ID418TD-r1-1in80-SA-S-OvarianCancer-8020H-Bed-181019.mzml | 418TD | GOOD      | Positive | Positive | Positive | Case3 | Positive |
| ID419TD-r1-1in80-SA-S-OvarianCancer-8020H-Bed-050919.mzml | 419TD | GOOD      | Negative | Positive | Positive | Case3 | Positive |
| ID432TD-r1-1in80-SA-S-OvarianCancer-8020H-Bed-180919.mzml | 432TD | VERY GOOD | Positive | Positive | Positive | Case3 | Positive |
| ID433TD-r1-1in80-SA-S-OvarianCancer-8020H-Bed-200919.mzml | 433TD | GOOD      | Positive | Positive | Positive | Case3 | Positive |
| ID466TD-r1-1in80-SA-S-OvarianCancer-8020H-Bed-200919.mzml | 466TD | GOOD      | Positive | Positive | Positive | Case3 | Positive |
| ID521TD-r1-1in80-SA-S-OvarianCancer-8020H-Bed-130919.mzml | 521TD | VERY GOOD | Positive | Positive | Positive | Case3 | Positive |
| ID524TD-r1-1in80-SA-S-OvarianCancer-8020H-Bed-110919.mzml | 524TD | VERY GOOD | Negative | Positive | Negative | Case3 | Positive |
| ID539TD-r1-1in80-SA-S-OvarianCancer-8020H-Bed-111019.mzml | 539TD | VERY GOOD | Positive | Positive | Positive | Case3 | Positive |
| ID556TD-r1-1in80-SA-S-OvarianCancer-8020H-Bed-160919.mzml | 556TD | VERY GOOD | Positive | Positive | Positive | Case3 | Positive |
| ID568TD-r1-1in80-SA-S-OvarianCancer-8020H-Bed-111019.mzml | 568TD | VERY GOOD | Positive | Positive | Positive | Case3 | Positive |
| ID585TD-r1-1in80-SA-S-OvarianCancer-8020H-Bed-160919.mzml | 585TD | VERY GOOD | Positive | Positive | Positive | Case3 | Positive |
| ID604TD-r1-1in80-SA-S-OvarianCancer-8020H-Bed-111019.mzml | 604TD | GOOD      | Positive | Positive | Negative | Case3 | Positive |
| ID624TD-r1-1in80-SA-S-OvarianCancer-8020H-Bed-130919.mzml | 624TD | VERY GOOD | Positive | Positive | Positive | Case3 | Positive |
| ID638TD-r1-1in80-SA-S-OvarianCancer-8020H-Bed-110919.mzml | 638TD | VERY GOOD | Positive | Positive | Positive | Case3 | Positive |
| ID64TD-r1-1in80-SA-S-OvarianCancer-8020H-Bed-130919.mzml  | 64TD  | VERY GOOD | Negative | Positive | Negative | Case3 | Positive |

|                                                           |       |           |          |          |          |       |          |
|-----------------------------------------------------------|-------|-----------|----------|----------|----------|-------|----------|
| ID67TD-r1-1in80-SA-S-OvarianCancer-8020H-Bed-111019.mzml  | 67TD  | VERY GOOD | Positive | Positive | Positive | Case3 | Positive |
| ID691TD-r1-1in80-SA-S-OvarianCancer-8020H-Bed-180919.mzml | 691TD | VERY GOOD | Positive | Positive | Positive | Case3 | Positive |
| ID737TD-r1-1in80-SA-S-OvarianCancer-8020H-Bed-180919.mzml | 737TD | VERY GOOD | Negative | Positive | Positive | Case3 | Positive |
| ID774TD-r1-1in80-SA-S-OvarianCancer-8020H-Bed-151019.mzml | 774TD | GOOD      | Negative | Negative | Negative | Case3 | Positive |
| ID83TD-r1-1in80-SA-S-OvarianCancer-8020H-Bed-160919.mzml  | 83TD  | VERY GOOD | Positive | Positive | Positive | Case3 | Positive |
| ID90TD-r1-1in80-SA-S-OvarianCancer-8020H-Bed-050919.mzml  | 90TD  | VERY GOOD | Positive | Positive | Negative | Case3 | Positive |
| ID93TD-r1-1in80-SA-S-OvarianCancer-8020H-Bed-110919.mzml  | 93TD  | VERY GOOD | Positive | Positive | Positive | Case3 | Positive |
| ID1818-r1-1in80-SA-S-OvarianCancer-8020H-Bed-050919.mzml  | 1818  | VERY GOOD | Positive | Negative | Negative | Case4 | Positive |
| ID2015-r1-1in80-SA-S-OvarianCancer-8020H-Bed-111019.mzml  | 2015  | GOOD      | Positive | Positive | Positive | Case4 | Positive |
| ID2160-r1-1in80-SA-S-OvarianCancer-8020H-Bed-181019.mzml  | 2160  | VERY GOOD | Negative | Negative | Positive | Case4 | Positive |
| ID2226-r1-1in80-SA-S-OvarianCancer-8020H-Bed-181019.mzml  | 2226  | GOOD      | Negative | Negative | Positive | Case4 | Positive |
| ID2226-r2-1in80-SA-S-OvarianCancer-8020H-Bed-011119.mzml  | 2226  | VERY GOOD | Negative | Negative | Positive | Case4 | Positive |
| ID2281-r1-1in80-SA-S-OvarianCancer-8020H-Bed-181019.mzml  | 2281  | VERY GOOD | Positive | Positive | Positive | Case4 | Positive |
| ID2716-r1-1in80-SA-S-OvarianCancer-8020H-Bed-181019.mzml  | 2716  | GOOD      | Negative | Negative | Positive | Case4 | Positive |
| ID2716-r2-1in80-SA-S-OvarianCancer-8020H-Bed-011119.mzml  | 2716  | VERY GOOD | Negative | Negative | Positive | Case4 | Positive |
| ID2804-r1-1in80-SA-S-OvarianCancer-8020H-Bed-200919.mzml  | 2804  | VERY GOOD | Positive | Positive | Positive | Case4 | Positive |
| ID4383-r1-1in80-SA-S-OvarianCancer-8020H-Bed-110919.mzml  | 4383  | VERY GOOD | Positive | Negative | Positive | Case4 | Positive |
| ID7343-r2-1in80-SA-S-OvarianCancer-8020H-Bed-011119.mzml  | 7343  | VERY GOOD | Positive | Negative | Positive | Case4 | Positive |
| ID7360-r1-1in80-SA-S-OvarianCancer-8020H-Bed-071019.mzml  | 7360  | VERY GOOD | Positive | Positive | Positive | Case4 | Positive |
| ID7994-r1-1in80-SA-S-OvarianCancer-8020H-Bed-111019.mzml  | 7994  | VERY GOOD | Negative | Positive | Positive | Case4 | Positive |
| ID8308-r1-1in80-SA-S-OvarianCancer-8020H-Bed-071019.mzml  | 8308  | VERY GOOD | Negative | Negative | Negative | Case4 | Negative |
| ID8338-r1-1in80-SA-S-OvarianCancer-8020H-Bed-071019.mzml  | 8338  | VERY GOOD | Positive | Negative | Positive | Case4 | Positive |
| ID8339-r1-1in80-SA-S-OvarianCancer-8020H-Bed-181019.mzml  | 8339  | VERY GOOD | Positive | Negative | Positive | Case4 | Positive |
| ID8366-r1-1in80-SA-S-OvarianCancer-8020H-Bed-160919.mzml  | 8366  | VERY GOOD | Positive | Positive | Positive | Case4 | Positive |
| ID8372-r1-1in80-SA-S-OvarianCancer-8020H-Bed-181019.mzml  | 8372  | VERY GOOD | Positive | Negative | Positive | Case4 | Positive |
| ID8394-r1-1in80-SA-S-OvarianCancer-8020H-Bed-050919.mzml  | 8394  | VERY GOOD | Negative | Negative | Positive | Case4 | Positive |
| ID8467-r1-1in80-SA-S-OvarianCancer-8020H-Bed-111019.mzml  | 8467  | VERY GOOD | Positive | Negative | Positive | Case4 | Positive |

|                                                          |      |           |          |          |          |       |          |
|----------------------------------------------------------|------|-----------|----------|----------|----------|-------|----------|
| ID8523-r1-1in80-SA-S-OvarianCancer-8020H-Bed-181019.mzml | 8523 | VERY GOOD | Negative | Negative | Positive | Case4 | Positive |
| ID8567-r1-1in80-SA-S-OvarianCancer-8020H-Bed-130919.mzml | 8567 | VERY GOOD | Negative | Negative | Positive | Case4 | Positive |
| ID8623-r1-1in80-SA-S-OvarianCancer-8020H-Bed-151019.mzml | 8623 | GOOD      | Positive | Negative | Positive | Case4 | Positive |
| ID8660-r1-1in80-SA-S-OvarianCancer-8020H-Bed-111019.mzml | 8660 | VERY GOOD | Positive | Negative | Positive | Case4 | Positive |
| ID8740-r1-1in80-SA-S-OvarianCancer-8020H-Bed-111019.mzml | 8740 | GOOD      | Negative | Negative | Positive | Case4 | Positive |
| ID8760-r1-1in80-SA-S-OvarianCancer-8020H-Bed-111019.mzml | 8760 | GOOD      | Positive | Negative | Positive | Case4 | Positive |
| ID8764-r2-1in80-SA-S-OvarianCancer-8020H-Bed-011119.mzml | 8764 | GOOD      | Negative | Negative | Positive | Case4 | Positive |
| ID8783-r1-1in80-SA-S-OvarianCancer-8020H-Bed-180919.mzml | 8783 | VERY GOOD | Negative | Negative | Positive | Case4 | Positive |
| ID8784-r1-1in80-SA-S-OvarianCancer-8020H-Bed-151019.mzml | 8784 | GOOD      | Positive | Negative | Positive | Case4 | Positive |
| ID8795-r2-1in80-SA-S-OvarianCancer-8020H-Bed-011119.mzml | 8795 | VERY GOOD | Negative | Positive | Positive | Case4 | Positive |
| ID8805-r1-1in80-SA-S-OvarianCancer-8020H-Bed-071019.mzml | 8805 | VERY GOOD | Positive | Positive | Positive | Case4 | Positive |
| ID8889-r1-1in80-SA-S-OvarianCancer-8020H-Bed-200919.mzml | 8889 | VERY GOOD | Positive | Negative | Positive | Case4 | Positive |
| ID8938-r2-1in80-SA-S-OvarianCancer-8020H-Bed-011119.mzml | 8938 | VERY GOOD | Negative | Positive | Positive | Case4 | Positive |
| ID8948-r1-1in80-SA-S-OvarianCancer-8020H-Bed-130919.mzml | 8948 | VERY GOOD | Positive | Positive | Positive | Case4 | Positive |
| ID8951-r1-1in80-SA-S-OvarianCancer-8020H-Bed-151019.mzml | 8951 | GOOD      | Negative | Negative | Positive | Case4 | Positive |
| ID8973-r1-1in80-SA-S-OvarianCancer-8020H-Bed-110919.mzml | 8973 | VERY GOOD | Positive | Positive | Positive | Case4 | Positive |
| ID8981-r1-1in80-SA-S-OvarianCancer-8020H-Bed-071019.mzml | 8981 | VERY GOOD | Negative | Positive | Positive | Case4 | Positive |
| ID8990-r1-1in80-SA-S-OvarianCancer-8020H-Bed-050919.mzml | 8990 | VERY GOOD | Negative | Negative | Positive | Case4 | Positive |
| ID9026-r1-1in80-SA-S-OvarianCancer-8020H-Bed-151019.mzml | 9026 | VERY GOOD | Negative | Positive | Positive | Case4 | Positive |
| ID9055-r1-1in80-SA-S-OvarianCancer-8020H-Bed-200919.mzml | 9055 | GOOD      | Negative | Positive | Positive | Case4 | Positive |
| ID9079-r1-1in80-SA-S-OvarianCancer-8020H-Bed-050919.mzml | 9079 | VERY GOOD | Positive | Positive | Positive | Case4 | Positive |
| ID9081-r1-1in80-SA-S-OvarianCancer-8020H-Bed-180919.mzml | 9081 | VERY GOOD | Positive | Negative | Positive | Case4 | Positive |
| ID9378-r1-1in80-SA-S-OvarianCancer-8020H-Bed-110919.mzml | 9378 | VERY GOOD | Positive | Positive | Positive | Case4 | Positive |
| ID9387-r1-1in80-SA-S-OvarianCancer-8020H-Bed-130919.mzml | 9387 | VERY GOOD | Negative | Negative | Positive | Case4 | Positive |
| ID9427-r1-1in80-SA-S-OvarianCancer-8020H-Bed-181019.mzml | 9427 | GOOD      | Negative | Negative | Positive | Case4 | Positive |
| ID11TD-r1-1in80-SA-S-OvarianCancer-8020H-Bed-071019.mzml | 11TD | VERY GOOD | Positive | Negative | Positive | Case4 | Positive |
| ID12TD-r1-1in80-SA-S-OvarianCancer-8020H-Bed-160919.mzml | 12TD | VERY GOOD | Positive | Positive | Positive | Case4 | Positive |
| ID13TD-r1-1in80-SA-S-OvarianCancer-8020H-Bed-071019.mzml | 13TD | VERY GOOD | Positive | Positive | Positive | Case4 | Positive |

|                                                            |        |           |          |          |          |         |          |
|------------------------------------------------------------|--------|-----------|----------|----------|----------|---------|----------|
| ID179PC-r1-1in80-SA-S-OvarianCancer-8020H-Bed-050919.mzml  | 179PC  | GOOD      | Positive | Positive | Positive | Case4   | Positive |
| ID17TD-r1-1in80-SA-S-OvarianCancer-8020H-Bed-181019.mzml   | 17TD   | GOOD      | Negative | Negative | Negative | Case4   | Negative |
| ID18TD-r1-1in80-SA-S-OvarianCancer-8020H-Bed-180919.mzml   | 18TD   | VERY GOOD | Positive | Positive | Positive | Case4   | Positive |
| ID19TD-r1-1in80-SA-S-OvarianCancer-8020H-Bed-181019.mzml   | 19TD   | GOOD      | Positive | Positive | Positive | Case4   | Positive |
| ID21TD-r1-1in80-SA-S-OvarianCancer-8020H-Bed-181019.mzml   | 21TD   | VERY GOOD | Positive | Positive | Positive | Case4   | Positive |
| ID22TD-r1-1in80-SA-S-OvarianCancer-8020H-Bed-111019.mzml   | 22TD   | VERY GOOD | Positive | Positive | Positive | Case4   | Positive |
| ID25TD-r1-1in80-SA-S-OvarianCancer-8020H-Bed-160919.mzml   | 25TD   | VERY GOOD | Positive | Positive | Positive | Case4   | Positive |
| ID26TD-r1-1in80-SA-S-OvarianCancer-8020H-Bed-160919.mzml   | 26TD   | VERY GOOD | Positive | Negative | Positive | Case4   | Positive |
| ID28TD-r1-1in80-SA-S-OvarianCancer-8020H-Bed-200919.mzml   | 28TD   | GOOD      | Positive | Negative | Positive | Case4   | Positive |
| ID33TD-r1-1in80-SA-S-OvarianCancer-8020H-Bed-110919.mzml   | 33TD   | VERY GOOD | Positive | Positive | Positive | Case4   | Positive |
| ID39TD-r1-1in80-SA-S-OvarianCancer-8020H-Bed-180919.mzml   | 39TD   | VERY GOOD | Negative | Positive | Positive | Case4   | Positive |
| ID3TD-r1-1in80-SA-S-OvarianCancer-8020H-Bed-071019.mzml    | 3TD    | VERY GOOD | Positive | Positive | Positive | Case4   | Positive |
| ID49TD-r1-1in80-SA-S-OvarianCancer-8020H-Bed-071019.mzml   | 49TD   | VERY GOOD | Positive | Positive | Positive | Case4   | Positive |
| ID4TD-r1-1in80-SA-S-OvarianCancer-8020H-Bed-071019.mzml    | 4TD    | VERY GOOD | Positive | Positive | Positive | Case4   | Positive |
| ID56TD-r1-1in80-SA-S-OvarianCancer-8020H-Bed-110919.mzml   | 56TD   | VERY GOOD | Positive | Positive | Positive | Case4   | Positive |
| ID57TD-r1-1in80-SA-S-OvarianCancer-8020H-Bed-130919.mzml   | 57TD   | VERY GOOD | Positive | Positive | Positive | Case4   | Positive |
| ID62TD-r1-1in80-SA-S-OvarianCancer-8020H-Bed-111019.mzml   | 62TD   | GOOD      | Negative | Negative | Positive | Case4   | Positive |
| ID6TD-r1-1in80-SA-S-OvarianCancer-8020H-Bed-160919.mzml    | 6TD    | VERY GOOD | Negative | Negative | Positive | Case4   | Positive |
| ID75PC-r1-1in80-SA-S-OvarianCancer-8020H-Bed-200919.mzml   | 75PC   | VERY GOOD | Positive | Negative | Positive | Case4   | Positive |
| ID9TD-r1-1in80-SA-S-OvarianCancer-8020H-Bed-181019.mzml    | 9TD    | VERY GOOD | Positive | Positive | Positive | Case4   | Positive |
| IDPC2007-r1-1in80-SA-S-OvarianCancer-8020H-Bed-071019.mzml | PC2007 | VERY GOOD | Positive | Positive | Positive | Case4   | Positive |
| ID5647-r2-1in80-SA-S-OvarianCancer-8020H-Bed-011119.mzml   | 5647   | VERY GOOD | Negative | Negative | Negative | Control | Negative |
| ID5648-r2-1in80-SA-S-OvarianCancer-8020H-Bed-011119.mzml   | 5648   | VERY GOOD | Negative | Negative | Negative | Control | Negative |
| ID5649-r1-1in80-SA-S-OvarianCancer-8020H-Bed-071019.mzml   | 5649   | VERY GOOD | Positive | Negative | Negative | Control | Positive |
| ID5650-r1-1in80-SA-S-OvarianCancer-8020H-Bed-130919.mzml   | 5650   | VERY GOOD | Negative | Negative | Negative | Control | Negative |
| ID5651-r1-1in80-SA-S-OvarianCancer-8020H-Bed-110919.mzml   | 5651   | VERY GOOD | Negative | Negative | Negative | Control | Negative |
| ID5653-r1-1in80-SA-S-OvarianCancer-8020H-Bed-180919.mzml   | 5653   | VERY GOOD | Negative | Negative | Negative | Control | Negative |
| ID5656-r2-1in80-SA-S-OvarianCancer-8020H-Bed-011119.mzml   | 5656   | VERY GOOD | Negative | Negative | Negative | Control | Negative |

|                                                          |      |           |          |          |          |         |          |
|----------------------------------------------------------|------|-----------|----------|----------|----------|---------|----------|
| ID5657-r1-1in80-SA-S-OvarianCancer-8020H-Bed-110919.mzml | 5657 | VERY GOOD | Negative | Negative | Negative | Control | Negative |
| ID5658-r2-1in80-SA-S-OvarianCancer-8020H-Bed-011119.mzml | 5658 | VERY GOOD | Negative | Negative | Negative | Control | Negative |
| ID5663-r1-1in80-SA-S-OvarianCancer-8020H-Bed-050919.mzml | 5663 | VERY GOOD | Negative | Negative | Negative | Control | Negative |
| ID5664-r2-1in80-SA-S-OvarianCancer-8020H-Bed-011119.mzml | 5664 | VERY GOOD | Negative | Negative | Negative | Control | Negative |
| ID5665-r1-1in80-SA-S-OvarianCancer-8020H-Bed-111019.mzml | 5665 | VERY GOOD | Negative | Negative | Negative | Control | Negative |
| ID5666-r1-1in80-SA-S-OvarianCancer-8020H-Bed-180919.mzml | 5666 | VERY GOOD | Negative | Negative | Negative | Control | Negative |
| ID5681-r1-1in80-SA-S-OvarianCancer-8020H-Bed-071019.mzml | 5681 | VERY GOOD | Negative | Negative | Negative | Control | Negative |
| ID5682-r1-1in80-SA-S-OvarianCancer-8020H-Bed-200919.mzml | 5682 | VERY GOOD | Negative | Negative | Negative | Control | Negative |
| ID5683-r1-1in80-SA-S-OvarianCancer-8020H-Bed-180919.mzml | 5683 | VERY GOOD | Negative | Negative | Negative | Control | Negative |
| ID5684-r1-1in80-SA-S-OvarianCancer-8020H-Bed-050919.mzml | 5684 | VERY GOOD | Negative | Negative | Negative | Control | Negative |
| ID5685-r1-1in80-SA-S-OvarianCancer-8020H-Bed-130919.mzml | 5685 | VERY GOOD | Negative | Negative | Positive | Control | Positive |
| ID5686-r1-1in80-SA-S-OvarianCancer-8020H-Bed-181019.mzml | 5686 | VERY GOOD | Negative | Negative | Negative | Control | Negative |
| ID5687-r1-1in80-SA-S-OvarianCancer-8020H-Bed-200919.mzml | 5687 | VERY GOOD | Negative | Negative | Negative | Control | Negative |
| ID5688-r1-1in80-SA-S-OvarianCancer-8020H-Bed-050919.mzml | 5688 | VERY GOOD | Negative | Negative | Negative | Control | Negative |
| ID5689-r1-1in80-SA-S-OvarianCancer-8020H-Bed-200919.mzml | 5689 | VERY GOOD | Negative | Negative | Negative | Control | Negative |
| ID5690-r2-1in80-SA-S-OvarianCancer-8020H-Bed-011119.mzml | 5690 | VERY GOOD | Negative | Negative | Negative | Control | Negative |
| ID5691-r1-1in80-SA-S-OvarianCancer-8020H-Bed-130919.mzml | 5691 | VERY GOOD | Negative | Negative | Negative | Control | Negative |
| ID5692-r1-1in80-SA-S-OvarianCancer-8020H-Bed-160919.mzml | 5692 | VERY GOOD | Negative | Negative | Negative | Control | Negative |
| ID5693-r2-1in80-SA-S-OvarianCancer-8020H-Bed-011119.mzml | 5693 | VERY GOOD | Negative | Negative | Negative | Control | Negative |
| ID5734-r1-1in80-SA-S-OvarianCancer-8020H-Bed-200919.mzml | 5734 | GOOD      | Negative | Negative | Negative | Control | Negative |
| ID5735-r1-1in80-SA-S-OvarianCancer-8020H-Bed-050919.mzml | 5735 | VERY GOOD | Negative | Negative | Negative | Control | Negative |
| ID5736-r1-1in80-SA-S-OvarianCancer-8020H-Bed-160919.mzml | 5736 | VERY GOOD | Negative | Negative | Negative | Control | Negative |
| ID5737-r1-1in80-SA-S-OvarianCancer-8020H-Bed-181019.mzml | 5737 | VERY GOOD | Negative | Negative | Negative | Control | Negative |
| ID5738-r1-1in80-SA-S-OvarianCancer-8020H-Bed-130919.mzml | 5738 | VERY GOOD | Negative | Negative | Negative | Control | Negative |
| ID5740-r1-1in80-SA-S-OvarianCancer-8020H-Bed-110919.mzml | 5740 | VERY GOOD | Negative | Negative | Negative | Control | Negative |
| ID5746-r1-1in80-SA-S-OvarianCancer-8020H-Bed-130919.mzml | 5746 | VERY GOOD | Negative | Negative | Negative | Control | Negative |
| ID5747-r2-1in80-SA-S-OvarianCancer-8020H-Bed-011119.mzml | 5747 | VERY GOOD | Negative | Negative | Negative | Control | Negative |
| ID5748-r1-1in80-SA-S-OvarianCancer-8020H-Bed-180919.mzml | 5748 | VERY GOOD | Negative | Negative | Negative | Control | Negative |

|                                                          |      |           |          |          |          |         |          |
|----------------------------------------------------------|------|-----------|----------|----------|----------|---------|----------|
| ID5771-r1-1in80-SA-S-OvarianCancer-8020H-Bed-071019.mzml | 5771 | VERY GOOD | Negative | Negative | Negative | Control | Negative |
| ID5772-r1-1in80-SA-S-OvarianCancer-8020H-Bed-111019.mzml | 5772 | VERY GOOD | Negative | Negative | Negative | Control | Negative |
| ID5773-r1-1in80-SA-S-OvarianCancer-8020H-Bed-110919.mzml | 5773 | VERY GOOD | Negative | Positive | Negative | Control | Positive |

#### CONFIRMATORY DETECTION PERFORMANCE OF THE ALGORITHMS

| MODELS                           | Sensitivity | 1-specificity | specificity |
|----------------------------------|-------------|---------------|-------------|
| Ovarian cancer EarlyStages (1+2) | 97.2%       | 3%            | 97%         |
| Ovarian cancer Stage 3           | 94.9%       | 3%            | 97%         |
| Ovarian cancer Stage 4           | 97.1%       | 3%            | 97%         |
| Algorithm combination            | 98.6%       | 8%            | 92%         |

#### DATA PROCESSING PERFORMANCE OF THE PIPELINE

|                          | Value | Units    |
|--------------------------|-------|----------|
| Number samples processed | 181   | MS files |
| Total running time       | 5931  | seconds  |

#### LEGEND

**Green** accurate prediction
